1           **Structural clusters of histone H3 and H4 residues regulate**  
2           **chronological lifespan in *Saccharomyces cerevisiae***

3

4

5           **Mzwanele Ngubo<sup>1§</sup>, Jessica Reid<sup>2</sup>, Hugh –G Patterton<sup>1,2,\*</sup>**

6

7

8

9   <sup>1</sup>Centre for Bioinformatics and Computational Biology, Stellenbosch University,  
10 Stellenbosch, South Africa

11   <sup>2</sup>Department of Biochemistry, Stellenbosch University, Stellenbosch, South Africa

12   <sup>§</sup>Present address: Ottawa Hospital Research Institute, Regenerative Medicine Program,  
13 Ontario, Canada

14

15   \*Corresponding author. E-mail [hpatterton@sun.ac.za](mailto:hpatterton@sun.ac.za), telephone +27 21-8082774

16   Running title: Histone mutations and chronological lifespan in yeast

17

## 18 **Abstract**

19 We have performed a comprehensive analysis of the involvement of histone H3 and H4  
20 residues in the regulation of chronological lifespan in yeast, and identify four structural  
21 groups in the nucleosome that influence lifespan. We also identify residues where  
22 substitution with an epigenetic mimic extends lifespan, providing evidence that a simple  
23 epigenetic switch, without possible additional background modifications, causes  
24 longevity. Residues where substitution result in the most pronounced lifespan extension  
25 are all on the exposed face of the nucleosome, with the exception of H3E50, which is  
26 present on the lateral surface, between two DNA gyres. Other residues that have a more  
27 modest effect on lifespan extension are concentrated at the extremities of the H3-H4  
28 dimer, suggesting a role in stabilizing the dimer in its nucleosome frame. Residues that  
29 reduce lifespan are buried in the histone handshake motif, suggesting that these  
30 mutations destabilize the octamer structure.

31 All residues exposed on the nucleosome disk face and that cause lifespan extension are  
32 known to interact with Sir3. We find that substitution of H4K16 and H4H18 cause Sir3 to  
33 redistribute from telomeres and silent mating loci to secondary positions, often enriched  
34 for Rap1, Abf1 or Reb1 binding sites, whereas H3E50 does not. The redistribution of Sir3  
35 in the genome can be reproduced by an equilibrium model based on primary and  
36 secondary binding sites with different affinities for Sir3. The redistributed Sir3 cause  
37 transcriptional repression at most of the new loci, including of genes where null mutants  
38 were previously shown to extend chronological lifespan. The transcriptomic profiles of  
39 H4K16 and H4H18 mutant strains are very similar, and compatible with a DNA replication  
40 stress response. This is distinct from the transcriptomic profile of H3E50, which matches

41 strong induction of oxidative phosphorylation. We propose that the different groups of  
42 residues are involved in binding to heterochromatin proteins, in destabilizing the  
43 association of the nucleosome DNA, disrupting binding of the H3-H4 dimer in the  
44 nucleosome, or disrupting the structural stability of the octamer, each category impacting  
45 on chronological lifespan by a different mechanism.

46

## 47 **Introduction**

48 In an attempt to understand the biochemical context of human diseases of aging such as  
49 cancer, diabetes, hypertension and cognitive decline, the regulation of lifespan has been  
50 studied as a controlled cellular process<sup>1</sup>. Many interconnected pathways have been  
51 implicated in the process of aging<sup>1</sup>. Although there is no clear understanding of the  
52 fundamental biochemical mechanism that allows prolonged cellular senescence and  
53 extended chronological lifespan, it is known that many of the signaling pathways involved  
54 in lifespan extension terminate at induced expression of stress related genes<sup>2</sup>.

55 Caloric restriction is a common trigger in many organisms that feeds into the evolutionary  
56 conserved, carbon limitation regulatory pathways such as the TORC1-Sch9 or the Ras1-  
57 cAMP-PKA pathways<sup>3,4</sup>. These two pathways converge on Rim15, which translocates to  
58 the nucleus when either the TORC1 or Ras1 pathways is inhibited, and facilitate binding  
59 of Msn2/Msn4 and Hsf1 to stress responsive and heat shock factor elements,  
60 respectively, inducing stress response genes<sup>5</sup>. The mitochondrial retrograde response  
61 represents an alternative pathway that signals mitochondrial stress to the nucleus. Here,  
62 the Rtg1-Rtg3 complex migrates to the nucleus and binds to R-boxes in conjunction with  
63 the SAGA-related SLIK1 acetyltransferase complex, inducing expression of the Rtg  
64 responsive genes, including CIT2, that catalyzes citrate synthesis in the glyoxylate cycle.  
65 All three pathways have an impact on chronological lifespan (CL) in yeast<sup>6</sup>, but the full  
66 range of targets of these pathways are not known. Additional pathways that are involved  
67 in the regulation of lifespan include the mitochondrial Unfolded Protein Response<sup>7</sup> and  
68 induction of autophagy<sup>8</sup>.

69 There is also increasing evidence that epigenetic changes are an integral part of the  
70 dynamics of aging<sup>9</sup>, both as a result of aging, such as accumulation of H3K27me3 with  
71 time<sup>10</sup>, and impacting on the regulation of aging<sup>11,12</sup>. These epigenetic changes include  
72 histone modifications, histone modifying enzymes and transcription factor localization<sup>12</sup>.  
73 The involvement of epigenetics was originally hinted at by the identification of the histone  
74 deacetylase, Sir2, in lifespan regulation<sup>13</sup>. Although this identification is now  
75 controversial<sup>14</sup>, an association between SIRT6 and longevity in rodents was recently  
76 reported<sup>15</sup>. Furthermore, both high levels of H3K36 methylation<sup>16</sup> and the substitution of  
77 H4K16 was shown to increase replicative lifespan<sup>17</sup>. The yeast silencing complex formed  
78 by Sir2, Sir3 and Sir4 was also shown to be important in lifespan regulation<sup>18</sup>, suggesting  
79 that heterochromatin is involved in this process<sup>11</sup>. Histone H3K4 methylation and H3T11  
80 phosphorylation are the only histone modifications to date shown to affect chronological  
81 lifespan (CL) in yeast as opposed to representing a consequence of it<sup>19,20</sup>.

82 It was shown that transgenic mice, where a limited number of double strand breaks  
83 (DSBs) were made in the genome by induction of I-Ppol, displayed many features  
84 associated with old age at 10 months post treatment, including loss of visual acuity,  
85 muscle mass and neurological changes, when compared to an untreated control group<sup>21</sup>.  
86 Mouse embryonic fibroblasts derived from the same transgenic mouse line, displayed  
87 decreased H3K27ac, and H3K56ac, and increased H3K122ac levels in response to  
88 induced DSBs<sup>22</sup>. It was proposed that the repetitive repair of the DSBs causes a  
89 redistribution of histone modification marks, triggering the misregulation of a subset of  
90 genes that results in accelerated chronological aging<sup>21,22</sup>.

91 Here we focus on the reversed question, asking what the impact of histone modifications  
92 and epigenetic marks are on aging, as opposed to what epigenetic marks change as a  
93 result of aging. We identify categories of histone H3 and H4 residue substitution that  
94 impact on extension or reduction of CL, and demonstrate that substitutions with a  
95 profound impact on lifespan extension may act through very different signalling pathways  
96 and transcriptomic programmes.

## 97 **Results**

### 98 **Identifying histone H3 and H4 residues involved in the regulation of lifespan**

99 We studied approximately 400 barcoded, non-lethal, synthetic histone H3 and H4 mutants  
100 in *Saccharomyces cerevisiae*<sup>23</sup>, to gain an insight into the role of histone modifications in  
101 the regulation of CL. Each residue was systematically substituted with an alanine or a  
102 residue that mimicked the unmodified and modified state of an epigenetic switchable  
103 residue<sup>23</sup>. A culture that initially contained an equal level of each histone mutant strain  
104 was maintained in stationary phase for 55 d, quiescent cells isolated, and the level of  
105 each strain determined by independent quantitation of two DNA barcodes at progressive  
106 times. Quiescent cells were used to quantitate the level of healthy cells that were aging,  
107 as opposed to non-quiescent cells that were dying and had initiated apoptosis<sup>24</sup>. This  
108 “bar-seq” approach was previously shown to accurately quantitate individual strains in a  
109 mixture of barcoded yeast strains in culture<sup>25</sup>. We found that the level of some strains  
110 decreased at a lower rate, and others at a faster rate, compared to the population median  
111 or the parental WT (Figure 1a). The results of the quantitation by barcode sequencing are  
112 given in Supplementary Table 1. Although extended culturing of yeast in stationary phase

113 increases acetic acid levels in the medium, this extended culturing is appropriate for  
114 studying CL, since it was shown that yeast faithfully reproduced responses and induction  
115 of pathways associated with chronological aging observed in other model organisms that  
116 were not exposed to elevated levels of acetic acid<sup>26</sup>.

## 117 **Residues with the largest impact on chronological lifespan extension are exposed** 118 **on the nucleosome disk face**

119 The 10 individual residues that caused the most pronounced lifespan extension  
120 (red residues in Fig. 1a,c) are all located either in the H4 tail or exposed on the solvent  
121 accessible face of the nucleosome, within the sectors previously identified as the Swi/Snf  
122 independent (Sin) or the Loss or rDNA silencing (Lrs) sectors at SHL $\pm$ 0.5 and  $\pm$ 2.5<sup>27</sup>.

123 H4K16 Q and R substitutions were previously shown to prolong replicative aging<sup>17</sup>.  
124 We have identified H4K16 as a residue also implicated in chronological lifespan extension  
125 (CLE) (Supplementary Table 1). Interestingly, any mutation of H4K16 (to Q, R, or A)  
126 cause an increase in CL (Supplementary Table 1), suggesting that a lysine residue is  
127 specifically required at position 16 for normal CL. This suggestion is supported by the  
128 observation that both the H4 $\Delta$ 9-16 and H4 $\Delta$ 12-16 tail deletions extend lifespan (Figure 1i  
129 and Supplementary Table 1). Interestingly, the H4 tail deletions  $\Delta$ 1-12 extended CL,  
130 whereas the short N-terminal deletion  $\Delta$ 1-4 reduced lifespan, demonstrating that the  
131 combined loss of H4 residues 5-12 were sufficient to abrogate the negative effect of loss  
132 of residues 1-4 (Figure 1i and Supplementary Table 1). This is supported by the extended  
133 lifespan observed for the  $\Delta$ 5-12 H4 deletion (Figure 1i and Supplementary Table 1).

134           The solvent exposure of the top 10 individual residues where mutation prolong  
135 lifespan suggests that these residues are involved in binding to a protein on the surface  
136 of the nucleosome disk. It is known that H4K16, H4H18, H4L22, H4N25, and H3T80,  
137 identified in the strains with extended lifespan, all interact with the Sir3 BAH domain<sup>28,29</sup>.  
138 Sir3 is involved in establishing transcriptionally repressive heterochromatin at the  
139 telomeres and silent mating type loci. The only residue in this solvent exposed group that  
140 is not known to interact with the BAH domain is H3E50. H3E50 is exposed on the lateral  
141 surface of the nucleosome core between two DNA gyres (Figure 1c,d), suggesting that  
142 H3E50 may influence the regulation of yeast lifespan through a different, Sir3-  
143 independent pathway. H3E50 makes an H-bond to H4R39 in  $\alpha 1$  of H4, which could  
144 contribute to placing the N-terminal tail of H3 in the correct radial position in the  
145 nucleosome (Supplementary Fig. 1a).

146   **The top 10% of residues that cause moderate chronological lifespan extension are**  
147   **concentrated at the H3-H4 dimer extremities**

148           Strikingly, the top tenth percentile of residues associated with prolonged CL,  
149 excluding those on the solvent exposed face of the nucleosome and H3E50, are  
150 concentrated at the extremities of the histone fold domain (violet residues in Fig. 1a).  
151 Residues in this category appear to be concentrated at the H3  $\alpha 3$  C-terminus, the C-  
152 terminal region of  $\alpha 2$  and L2 of H3, the N- and C-terminal regions of  $\alpha 1$  and L1 of H3, the  
153 N-terminal region of H4  $\alpha 2$ , bracketing the H4 L2 at the C-terminus of  $\alpha 2$  and N-terminus  
154 of  $\alpha 3$ , and in the region where H4  $\alpha 1$  passes over H3  $\alpha N$  (Fig. 1b,c). The interactions of  
155 these residues specifically exclude the extensive interactions between dimer partners,



156 and seem enriched for contacts that stabilize the conformation of the histone fold domain  
157 and the H3-H4 dimer in its frame within the nucleosome structure (see Supplementary  
158 Note). It is not immediately clear what the impact of mutations at these positions are on  
159 dynamic nucleosome structure.

## 160 **Residues implicated in a reduced CL are buried, and may destabilise the octamer**

161 The positions of the mutated residues in the ten strains with most reduced  
162 lifespans (Fig. 1e) in the quiescent pool are shown in Fig. 1f,g. Most H3 tail deletions,  
163 including the short N-terminal deletion  $\Delta$ 1-4, resulted in reduced lifespan, showing that an  
164 intact H3 tail is required for normal lifespan (Figure 1i and Supplementary Table 1). In  
165 contrast, short internal H3 tail deletions  $\Delta$ 17-24,  $\Delta$ 24-28 and  $\Delta$ 29-32 extends lifespan  
166 (Figure 1i and Supplementary Table 1). The first two of these short deletions bracket the  
167 residues K23 and K27, both in the top 10% of residues that extend lifespan when mutated  
168 (Figure 1i and Supplementary Table 1). Notably, substitution of four histone H3 tail lysine  
169 residues with arginine (H3K4, 9, 14, 18R) reduce lifespan. Either this suggests that  
170 mimicking a constitutively deacetylated state for these lysine residues decreased lifespan,  
171 or that a modifiable lysine is required for normal lifespan. The latter seems likely, since  
172 the H3K18Q mutant, mimicking a constitutive acetylated state, also exhibits a shortened  
173 lifespan (Supplementary Table 1). In addition, deletion of Set1, which abrogates  
174 methylation of H3K4, decreased CL, and, conversely, deletion of the H3K4me3  
175 demethylase, Jhd2, increased CL<sup>19</sup>, arguing that a modifiable H3K4 residue is necessary  
176 for a normal CL.

177           The location of the residues where mutations decreased lifespan is summarized in  
178 Fig. 1**f,g**. It is striking that, unlike the solvent exposed residues (Fig. 1**b,c**) or residues  
179 implicated in stabilizing each H3-H4 dimer in a structural frame (Fig. 1**b,c**), all residues  
180 implicated in a shortened lifespan, except for the H3 N-terminal tail mutations, are buried  
181 within the octamer structure, and occur between interacting sections of the histone fold  
182 domains (Figure 1**f,g**). We speculate that the mutations that cause a shortened lifespan  
183 contribute to the structural destabilization of the histone octamer and disruption of  
184 nucleosomes and chromatin structures (Supplementary Note). It was previously shown  
185 that reducing histone H3 and H4 levels, and presumably nucleosome density, resulted in  
186 a reduced CL<sup>30</sup>.

187           We verified the results of the barcode approach by confirming the survival of select  
188 strains implicated in lifespan regulation in biological replicates (Figure 2). The  
189 reproducibility of the observed lifespans also shows that the result of the bar-seq  
190 quantitation does not simply reflect the population variance of a random process.

### 191 **The H4K16 and H4H18 mutants cause re-distribution of Sir3 in the genome**

192           The solvent exposed residues H4K16, H4H18, H4L22, H4N25 and H3T80 all  
193 interact with the BAH domain of Sir3 in the crystal<sup>28</sup>, and substitution of these residues  
194 cause CLE. These substitutions are expected to disrupt the binding of Sir3 on the side  
195 of the nucleosome<sup>28,29</sup>. To investigate the effect of mutation of these residues on the  
196 genomic distribution of Sir3, we performed a ChIP-seq analysis of H4K16Q, H4H18A and  
197 H3E50A mutants. These mutations were selected to include one residue previously  
198 implicated in lifespan extension, H4K16, albeit replicative lifespan<sup>17</sup>, a residue newly

199 identified to cause CLE, H4H18, and a residue similarly shown to cause CLE, but unlikely  
200 to be involved in direct Sir3 binding, H3E50.

201 After incubating cultures for 6 d, the Sir3 occupancy at HML $\alpha$  and HMRA were  
202 found to be reduced by at least two-fold in the H4K16Q and H4H18A mutants, and to  
203 approximately 80% of the WT level at HML $\alpha$  in the H3E50A mutant strain (Figure 3a,b).  
204 In a WT cell Sir3 was enriched at the telomere X element and the borders of the Y'  
205 element, as previously reported<sup>31</sup>. Sir3 binding was reduced at the X elements in the  
206 H4K16Q, H4H18A and H3E50A strains, but remained at levels comparable to the WT at  
207 the Y' element (Figure 3c). When looking at Sir3 distribution throughout the whole  
208 genome, it is seen that the levels of Sir3 at the terminal 20 kb of chromosomes,  
209 normalised to the genome, are significantly lower (*t*-test,  $p < 0.05$ ) in the H4K16Q and  
210 H4H18A mutants compared to the WT (Figure 4). There is no significant difference in  
211 Sir3 telomeric levels between the WT and the H3E50A mutant, but there is a significant  
212 difference between the levels between the H4K16Q or H4H18A mutant and the H3E50A  
213 mutant (*t*-test,  $p < 0.05$ ). A similar pattern of differences is seen between the Sir3 levels  
214 at the chromosome cores, excluding the terminal 20 kb (Figure 4). This demonstrates  
215 that Sir3 is redistributed from the telomeres to the chromosome cores in the H4K16Q and  
216 H4H18A mutants. This may reflect a migration from a compromised nucleosome binding  
217 site to secondary binding sites in the genome with binding affinities that are now  
218 competitive with the mutant nucleosome. No significant change in the telomeric  
219 distribution of Rap1, which recruits Sir3 to the telomeres to form silent heterochromatin<sup>31</sup>,  
220 is seen when comparing the H4H18A mutant to the WT strain, underlining the fact that  
221 Rap1 binds to DNA<sup>32</sup> whereas Sir3 associates with nucleosomes (Fig 5). It was

222 previously shown that Rap1 redistributed from the telomeres to internal sites in a *Δtlc1*  
223 strain with shortened telomeres, which was proposed to represent an aged senescent  
224 cellular state<sup>33</sup>. However, this relocation was likely due to decreased Rap1 binding  
225 sequence and not simulated age, since we saw no evidence of such a reorganization with  
226 chronological aging over a 14 d period (Supplementary Fig. 2).

### 227 **Re-distributed Sir3 is associated with transcriptional repression at the new loci.**

228 Sir3 peaks were identified in the ChIP-seq data of the mutant strains. To assess whether  
229 the redistributed Sir3 repressed transcription in the newly occupied regions, we analysed  
230 the differential expression of genes in the mutant strains relative to the WT when the  
231 transcribed gene, including a 500 bp upstream region, overlapped with the identified new  
232 Sir3 peak. In the H4K16Q mutant, 33 genes overlapped with Sir3 peaks, of which 22  
233 genes were repressed compared to the WT. Given that 48% of the quantitated genes in  
234 the complete RNA-seq data set were down-regulated, a binomial probability distribution  
235 function of  $\binom{33}{22} \times 0.48^{22} \times 0.52^{11} = 0.01$  is obtained. Thus, there is only a 1% chance that  
236 random selection of 33 genes from this RNA-seq data set will include 22 down-regulated  
237 genes, strongly suggesting that the redistributed Sir3 indeed represses gene expression  
238 at most of the newly occupied loci.

239 There is no unique transcription factor binding site associated with all re-distributed Sir3  
240 peaks. Importantly, Sir3 peaks were not always associated with an ARS consensus  
241 sequence, found in the E elements of the HM cassettes. We calculated the significance  
242 of the presence of factor binding sites in Sir3 peaks given the number of such factor sites  
243 in the genome, and assuming a Poisson probability distribution (Supplementary Table 2).

244 It seems that Sir3 distributes to a number of sites, recruited by a combination of factors  
245 including Abf1, Rap1 and other factors (Supplementary Table 2). It therefore appears  
246 likely that Sir3 redistributes to a number of diverse secondary binding sites in the genome  
247 in the H4K16 and H4H18 mutant strains.

248 Considering the genes associated with Sir3 peaks in the mutant strains, we found that  
249 the YIL055C gene is common to all three extended CL mutant strains (Supplementary  
250 Fig. 3 and Supplementary Table 3). YIL055C encodes a protein of unknown function that  
251 is associated with the mitochondrion and interacts genetically with the histone  
252 deacetylases Hda1 and Hos1, subunit 8 of ubiquinol cytochrome-c reductase (Complex  
253 III), the  $\beta$ -subunit of the Sec61-Sss1-Sbh1 ER translocation complex, actin and Cdc13,  
254 the telomere repeat binding protein involved in the regulation of telomere replication. A  
255  $\Delta yil055c$  strain is, however, not associated with CLE<sup>34,35</sup>.

256 The redistributed Sir3 peaks of the H4K16Q and H4H18A mutant strains commonly cover  
257 MAM3, encoding a protein associated with the ER membrane that is required for  
258 mitochondrial morphology, and SND1, encoding a protein involved in alternative ER  
259 targeting. Again, neither  $\Delta mam3$  nor  $\Delta snd1$  strains are associated with CLE<sup>34,35</sup> (Fig. 6).

260 It was previously shown that the propagation and termination of repressive  
261 heterochromatin domains occur with a degree of randomness that is the basis for position  
262 effect variegation<sup>36</sup>. It is thus expected that the exact positions of the new loci associated  
263 with Sir3 will differ between cells and between strain, which could allow different genes  
264 that have an impact on the regulation of lifespan to be repressed in the otherwise identical  
265 H4K16 and H4H18 mutant strains. The GDH1 glutamate dehydrogenase gene is

266 repressed in the H4K16 mutant strain, and is associated with a CLE phenotype in a null  
267 strain<sup>34</sup>. In the H4H18 mutant strain the AGP1, HTZ1 and SHR5 genes, encoding a  
268 glutamine transporter, the histone H2A.Z, and a palmitoyltransferase that suppresses  
269 Ras1 function, are associated with new Sir3 loci, and were all shown to be associated  
270 with CLE phenotypes in null mutants<sup>34,35</sup>. The redistributed Sir3 is thus associated with  
271 genes that were previously shown to confer extended CLs in null mutants, and could  
272 provide a simple, causative link between Sir3 redistribution and lifespan expansion.

273 **The H4K16Q and H4H18A mutants have similar transcription profiles that differ**  
274 **from that of H3E50A**

275 Although it is possible that the repression of one or a few genes by redistributed Sir3 may  
276 impact on the expression of a central and important component in a pathway involved in  
277 the regulation of CL, and single genes identified above may contribute to lifespan  
278 extension, we note that the transcriptomic profile of the CLE strains differ from that of the  
279 WT strain at hundreds of genes. It is thus likely that the histone mutations also have gene  
280 regulatory effects other than Sir3 binding, or that the redistribution of Sir3 in the genome  
281 have indirect effects that impact on many additional genes, some of which are involved  
282 in CLE. We therefore analysed the RNA-seq data of three CLE strains to attempt to  
283 identify functional GO categories or pathways that presented an additional possible  
284 mechanistic basis for the observed extended CL.

285 Gene expression is significantly down-regulated in stationary phase<sup>37</sup>. Although the  
286 expression or repression of specific genes in stationary phase may support CLE, we were  
287 interested in the transcription programme that preceded stationary phase, and that may

288 prepare a biochemical state that allowed subsequent extended CL in stationary phase.

289 For this reason, we performed RNA-seq analyses on cultures in late log phase.

290 The H4K16 and H4H18, H4K16 and H3E50 and H4H18 and H3E50 RNA-seq datasets  
291 have Spearman rank correlation coefficients of 0.7, -0.04 and -0.2 respectively, showing  
292 that H4K16 and H4H18 are most closely related, and that the H3E50 profile has little  
293 correlation to either of the H4 mutant strain sets.

294 An analysis of the GO terms for biological processes enriched for the genes that are  
295 induced in the H4K16Q strain (adjusted  $p < 0.05$ ) compared to the WT show a significant  
296 enrichment for biosynthetic processes, cytoplasmic translation, ribosome biogenesis and  
297 RNA processing (Supplementary Table 4). The largest number of induced genes further  
298 map to pathways involved in the biosynthesis of secondary metabolites and amino acids,  
299 ribosome biogenesis, RNA transport and purine metabolism (Supplementary Table 5).  
300 Genes that are down regulated in the H4K16Q strain (adjusted  $p < 0.05$ ) are associated  
301 with DNA integration, recombination and biosynthetic processes, as well as mitochondrial  
302 respiratory chain complex assembly (Supplementary Table 6). Down regulated pathways  
303 include metabolic, cell cycle, MAPK signalling, autophagy and carbon metabolism  
304 pathways (Supplementary Table 7). It thus appears that in late log the cell is actively  
305 synthesizing proteins, but shutting down oxidative phosphorylation and DNA synthesis. A  
306 very similar pattern of regulated genes and enriched GO functional categories and  
307 pathways was observed for the H4H18A strain (Supplementary Tables 4-7).

308 In contrast, the H3E50A mutant shows increased expression of genes associated with  
309 oxidation-reduction processes, generation of precursor metabolites, energy derivation by

310 oxidation of organic compounds, tricarboxylic acid cycle and the electron transport chain  
311 (Supplemental Table 4). Enriched pathways include carbon metabolism, tricarboxylic  
312 acid metabolism, respiratory electron transport chain, oxidative phosphorylation and  
313 autophagy (Supplemental Table 5). Down regulated genes include the GO functional  
314 categories of ribosome biogenesis, cytoplasmic translation, RNA processing  
315 (Supplementary Table 6), ribosome biogenesis, cell cycle, and purine metabolism  
316 pathways (Supplementary Table 7).

317 The transcriptomic profile of the H3E50A mutant strain is essentially the inverse of the  
318 H4K16Q and H4H18A strains. Protein synthesis is down regulated, and the tricarboxylic  
319 acid cycle and the oxidative phosphorylation is activated. It thus appears that the H3E50A  
320 strain is actively synthesizing ATP by oxidative phosphorylation in late log phase. MSN4,  
321 CIT2, SOD1 and SOD2 are all significantly induced in the H3E50A strain, suggesting that  
322 the mitochondrial retrograde response is active, and that the yeast cell is responding to  
323 oxidative stress and inducing Msn4 responsive stress genes. It is surprising that the  
324 mutation of a single residue that stabilises the position of the N-terminal tail of histone H3  
325 in the nucleosome induces a mitochondrial retrograde response or related transcriptomic  
326 effect. The H4K16Q and H4H18A strains display elevated MSN2/4 expression levels, but  
327 decreased CIT2, SOD1 and SOD2 levels, suggesting the absence of the retrograde  
328 response, and the presence of a general stress response in these mutant strains.

## 329 **Discussion**

330 We have identified four groups of H3 and H4 residues situated in different regions of the  
331 nucleosome where substitution have an impact on CL. The location of each group



332 provides a hint of the possible mechanistic route by which it influences CL. The first group  
333 consists of residues exposed to the solvent on the face disk of the nucleosome and  
334 present in the N-terminal tails. The residues on the face disk are involved in binding to  
335 the Sir3 heterochromatin protein and cause a pronounced extension of CL. The operative  
336 substitution of these residues do not necessarily represent valid epigenetic switches.  
337 H4K16, for example, confers CLE when substituted with either R, Q or A. It seems that  
338 an unmodified K residue stabilises binding to Sir3 by forming a hydrogen bond between  
339 the  $\epsilon$ -amino group and the S67 hydroxyl in the BAH domain of Sir3<sup>28</sup>, an association that  
340 is necessary for a normal CL. Any alteration disrupts this H-bond, irrespective of whether  
341 it is an epigenetic mimic or not, and extends CL. Another example is H4H18, a residue  
342 that was also shown to interact with Sir3 by formation of an H-bond between the imidazole  
343 imino group and E95 in the BAH domain<sup>28</sup>. H4H18 extends CL when mutated to an A,  
344 which does not represent a valid epigenetic state switch.

345 H3T11, on the other hand, present in the N-terminal tail of H3, extends CL when  
346 substituted with D, a mutation that mimics constitutive phosphorylation. The WT residue  
347 and the H3T11A mutant exhibit a CL similar to that of the population average. This  
348 category of residue is of acute interest, since it represents an epigenetic mark where  
349 transition between different epigenetic states modulate CL.

350 The second group of residues in the nucleosome is defined by the single member, H3E50.  
351 This residue, like the members of the first group, causes prolonged CL when mutated,  
352 but is not involved in binding to Sir3. The WT residue makes an H-bond to an amino  
353 group in H4R39, and contributes to setting the exit position of the H3 N-terminal tail in the

354 nucleosome. When substituted in the H3E50A mutant, CL is extended. It was previously  
355 shown that the H3E50A mutant has a double strand break checkpoint defect<sup>38</sup>,  
356 suggesting an alternative mechanistic pathway by which a histone residue can effect  
357 CLE.

358 The third group of residues are clustered at the extremities of the histone folds of H3 and  
359 H4, at L1 and L2, and are likely to be involved in stabilizing the conformations of the  $\alpha$ 1  
360 and  $\alpha$ 3 helices relative to  $\alpha$ 2, as well as binding to the DNA duplex. These residues may  
361 be involved in stabilizing the H3-H4 dimer in its structural frame in the nucleosome. It is  
362 possible that substitutions at the L1 and L2 positions influence H3-H4 dimer binding in  
363 the nucleosome, and are likely to have a pleiotropic effect and an impact on diverse  
364 functionalities of chromatin. This category of substitution is likely to confer CLE through  
365 several pathways, since it may involve disparate functions of the genome. Residues in  
366 group three typically extend CL to a lesser degree than residues in groups one and two.

367 The fourth category is composed of residues buried within the octamer, and are likely  
368 involved in stabilizing the histone octamer itself. Residues in the fourth category are  
369 exclusively associated with a shortened CL when substituted. We postulate that these  
370 mutations disrupt the structural stability of the nucleosome, a fundamental structural unit  
371 of chromatin, and may accelerate apoptosis. It was previously shown that loss of histone  
372 H3 and H4 reduced CL<sup>39</sup>.

373 The Workman group showed that H3T11 was phosphorylated by both Sch9 and Cka1,  
374 and reported that  $\Delta sch9$  and  $\Delta cka1$  as well as H3T11A prolonged CL<sup>20</sup>. Although this  
375 seems opposite to our result where the phosphorylated mimic H3T11D showed CLE, we

376 note that the  $\Delta sch9$  mutant strain will facilitate activated expression of Msn2/4 stress  
377 response genes associated with CLE<sup>40</sup>, and it is not clear if the CLE observed was due  
378 to absence of H3T11 phosphorylation or induction of stress response genes. A  
379 phosphorylated mimic H3T11D was not tested<sup>20</sup>.

380 A SPELL analysis<sup>41</sup> showed that both the H4K16 and H4H18 mutant gene expression  
381 profiles were most closely related to that of yeast strains under conditions of carbon and  
382 nitrogen stress or DNA replication stress. Importantly, neither the H4K16 nor H4H18  
383 mutant strain exhibited a gene expression profile similar to a *sir3* $\Delta$  strain. The H3E50  
384 transcriptomic profile matches most closely sets related to stationary phase entry, carbon  
385 utilization, diauxic shift, fermentation and respiration.

386 A search of the HistoneHits database<sup>42</sup> of the classic phenotypes associated with histone  
387 mutants showed that H3E50A was associated with a modest decrease in the DNA  
388 damage phenotype. H4K16A and H4K16Q showed decrease in telomeric silencing and  
389 mating efficiency, and H4K16A, H4K16Q and H4K16R showed HM cassette  
390 derepression. H4H18A and H4H18Q displayed defects in HM and telomeric silencing.  
391 The majority of H4 tail deletions between 1 and 28 exhibited HM cassette silencing  
392 defects. We note that although chronological aging is associated with HM derepression,  
393 derepression of HM per se does not cause chronological aging<sup>43</sup>.

394 We propose that the redistribution of Sir3 to alternative sites in the genome is caused by  
395 a change in the affinity of the binding site on the face of the nucleosome disk for the Sir3  
396 BAH domain, due to the substitution of an interacting histone residue. In *S. cerevisiae*,  
397 heterochromatin is typically initiated by the recruitment of a heterochromatin protein such

398 as Sir1 to a DNA-bound initiation factor such as Orc1<sup>44</sup>. The heterochromatin domain is  
399 propagated by the binding of a modifying enzyme such as the Sir2 deacetylase to the  
400 heterochromatin initiation core, deacetylation of H4K16ac of the adjacent nucleosome,  
401 binding of the heterochromatin protein complex Sir3/Sir4 to the modified nucleosome, and  
402 re-recruitment of Sir2 by the newly deposited Sir3/Sir4. The continuous, repetitive  
403 modification of each adjacent nucleosome and subsequent binding of Sir3/Sir4 leads to  
404 the progressive extension of the heterochromatin domain along the DNA<sup>45,46</sup>.

405 Both the initiation factor as well as the nucleosome contribute to define a binding affinity,  
406 and this initial affinity will influence successive binding affinities in the propagated  
407 heterochromatin domain due to contact between the neighbouring Sir3/Sir4 sub-units<sup>46</sup>.  
408 This propagation continues with a defined probability with every consecutive, interacting  
409 Sir3/Sir4 sub-unit, or until firm termination by an insulator, TFIIIC bound to a pol III gene  
410 A-box<sup>47</sup> or a euchromatic domain defined by an epigenetic modification such as  
411 H3K79me3<sup>48</sup> or the enrichment of histone variant Htz1<sup>49</sup>.

412 We did not detect any transcription factor binding site that was invariably associated with  
413 the redistributed Sir3 domains in the mutant strains. A range of sites were linked to the  
414 new loci, suggesting that Sir3 is recruited to different regions of the genome by a number  
415 of different or even a mixture of initiator factors such as Abf1 and Rap1, known to bind to  
416 Sir3<sup>50</sup>. These secondary binding sites will also have an affinity defined by a combination  
417 of the recruiting factor and the binding site on the nucleosome face.

418 The binding of Sir3 to a high affinity, primary site, such as an HM locus, can be described  
419 by the equilibrium equation

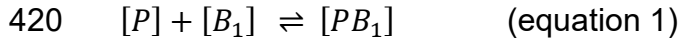

421 where  $[P]$  and  $[B_1]$  represents the concentrations of Sir3 and the nucleosome binding site,  
422 respectively, and  $[PB_1]$  is Sir3 bound to the binding site. The association constant  $K_{a1}$  is  
423 defined by

424  $K_{a1} = \frac{[PB_1]}{[P][B_1]}$  (equation 2)

425 Similarly, the binding to a low affinity, secondary binding site can be represented by

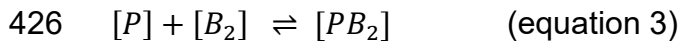

427 where  $[B_2]$  represent the concentration of the secondary binding site and  $[PB_2]$  is bound  
428 Sir3.

429 The fractional binding  $f_{PB_1}$  of Sir3 associating with the primary site  $B_1$ , assuming that  $[P]$   
430 is limiting, thus  $[P] \ll [B_1]$ , is given by

431  $f_{PB_1} = \frac{[PB_1]}{[P] + [PB_1] + [PB_2]}$  (equation 4)

432  $= \frac{K_{a1} \cdot [P] \cdot [B_1]}{[P] + K_{a1} \cdot [P] \cdot [B_1] + K_{a2} \cdot [P] \cdot [B_2]}$  (equation 5)

433 Fractional binding of Sir3 to the secondary site  $B_2$  is similarly given by

434  $f_{PB_2} = \frac{[PB_2]}{[P] + [PB_1] + [PB_2]}$  (equation 6)

435 
$$= \frac{K_{a2} \cdot [P] \cdot [B_2]}{[P] + K_{a1} \cdot [P] \cdot [B_1] + K_{a2} \cdot [P] \cdot [B_2]} \quad (\text{equation 7})$$

436 Assuming that  $[B_1] \approx [B_2] = [B]$ , which appears likely, judged by the comparable number  
437 of Sir3 peaks observed in the WT and the mutant strains, gives

438 
$$f_{PB_1} = \frac{K_{a1} \cdot [B]}{1 + [B] \cdot (K_{a1} + K_{a2})} \approx \frac{K_{a1}}{K_{a1} + K_{a2}} \quad \text{if } B \gg 1 \quad (\text{equation 8})$$

439 
$$f_{PB_2} = \frac{K_{a2} \cdot [B]}{1 + [B] \cdot (K_{a1} + K_{a2})} \approx \frac{K_{a2}}{K_{a1} + K_{a2}} \quad \text{if } B \gg 1 \quad (\text{equation 9})$$

440 Setting  $K_{a1}$  and  $K_{a2}$  of the high and low affinity binding sites equal to  $50 \mu\text{M}^{-1}$  and  $10 \mu\text{M}^{-1}$ ,  
441 implies a  $f_{PB_1} = 5/6$  and  $f_{PB_2} = 1/6$ . The high affinity binding sites are thus bound at a 5-  
442 fold higher level than the low affinity binding sites. If the  $K_{a1}$  in the mutant strain is  
443 decreased by 5-fold from  $50$  to  $10 \mu\text{M}^{-1}$  due to the disruption of the Sir3 binding surface  
444 on the nucleosome face, and  $K_{a2}$ , representing a different initiator factor in combination  
445 with a nucleosome face, is reduced 2-fold from  $10$  to  $5 \mu\text{M}^{-1}$ ,  $f_{PB_1} = 4/6$  and  $f_{PB_2} = 2/6$ .  
446 Thus, a 20% reduction in binding to the primary site and a 100% increase in binding to a  
447 secondary site will be evident.

448 We propose that we observe a related binding scenario in the mutant strains. A lesser  
449 reduction in the binding affinity to secondary sites causes a displacement of Sir3 from the  
450 high affinity binding sites in the WT, to weaker secondary binding sites. These have  
451 binding affinities in the same order of magnitude as the compromised primary binding  
452 sites in some mutant strains. This allows the redistribution of Sir3 to secondary sites that  
453 are randomly distributed throughout the genome, fortuitously repressing genes near the

454 new loci, including genes where null mutants were implicated in CLE. We therefore  
455 propose that the redistribution of heterochromatin domains are not mechanistically  
456 directly responsible for an extended lifespan, but that the incidental repression of genes  
457 that regulate lifespan cause the observed CLE.

## 458 **Methods**

### 459 **Yeast strains and media**

460 The histone mutant library, constructed by the Boeke group<sup>23</sup>, and based on the parental  
461 strain JDY86 (*MATa*, *his3Δ200*, *leu2Δ0*, *K2Δ0*, *trp1Δ63*, *ura3Δ0*, *met15Δ0*,  
462 *can1::MFA1pr-HIS3*, *hht1-hhf1::NatMX4*, *hht2-hhf2::[HHTS-HHFS]-URA3*, where  
463 *[HHTS-HHFS]* designates the mutated histone which is either H3 or H4) was purchased  
464 from Thermo Fischer Scientific. YPD yeast growth medium was prepared with 1% (w/v)  
465 yeast extract, 2% (w/v) peptone and 2% (w/v) glucose. Agar-YPD contained 2% (w/v)  
466 bacto-agar. All media were sterilized by autoclaving before use, and all chemicals were  
467 molecular biology grade.

### 468 **Culturing of the pooled library**

469 The histone H3 and H4 mutant library was replica plated onto omnitray YPD-agar plates,  
470 and selected with 200 ng/ml nourseothricin (Sigma) antibiotic. Colonies were grown for  
471 2-3 days at 30°C. Slow-growing colonies were separately streaked out from the original  
472 stock, and grown for 2-3 days at 30°C. The contents of all the plates, including the slow-  
473 growers (equivalent volume of a normal colony) were scraped off, and pooled in a 50 ml  
474 conical centrifuge tube containing YPD liquid media with 200 ng/ml nourseothricin. The

475 pooled culture was diluted to a final concentration of  $OD_{600} = 50$ , 15% (v/v) glycerol was  
476 added, and stored as aliquots at  $-80^{\circ}\text{C}$ .

477 The pooled culture was inoculated into 100ml YPD liquid media to a final concentration  
478 of  $OD_{600} \sim 0.003$ . Cells were grown with rotary shaking (180 rpm) at  $30^{\circ}\text{C}$  for  
479 approximately 10 generations ( $\sim 15$  h). The pooled culture was then further diluted to  
480  $OD_{600}$  of 0.06 in 250 ml YPD liquid media, and incubated for up to 55 d with continual  
481 shaking (180 rpm) at  $30^{\circ}\text{C}$ . Aliquots (10 ml) were recovered at the times indicated.

## 482 **Bar-code sequencing**

483 Culture aliquots were washed twice with 5 ml water, the cells resuspended in 1 ml of 50  
484 mM Tris-HCl (pH 7.5), and carefully overlaid onto a performed Percoll gradient<sup>24</sup>, and  
485 centrifuged at 400 g, 60 min,  $20^{\circ}\text{C}$  in a GH-3.8 swinging bucket rotor (Beckman).  
486 Quiescent cells were collected with a Pasteur pipette and washed once with 30 ml of 50  
487 mM Tris-HCl pH 7.5 at 650 g, 5 min,  $20^{\circ}\text{C}$  in a GH-3.8 swinging bucket rotor. Genomic  
488 DNA was isolated from 1 ml quiescent fractions (YeaStar kit, Zymo Research, Protocol  
489 I), and the DNA eluted with 60  $\mu\text{l}$  of TE buffer (10 mM Tris-HCl pH 8.0, 0.1 mM EDTA),  
490 and stored at  $-80^{\circ}\text{C}$ . The “up” and “down” bar-code sequences were separately amplified  
491 in two reaction volumes containing 50 ng of genomic DNA, 0.3  $\mu\text{l}$  of 5 U/ $\mu\text{l}$  FastStart Taq  
492 DNA polymerase (Roche), 0.4  $\mu\text{l}$  of 100  $\mu\text{M}$  “up” or “down” barcode primer pair, 0.5  $\mu\text{l}$  of  
493 10 mM dNTP, 12  $\mu\text{l}$  of 25 mM  $\text{MgCl}_2$ , 3  $\mu\text{l}$  of 10x PCR buffer without  $\text{MgCl}_2$ , and water to  
494 in a final volume of 30  $\mu\text{l}$ . The primer sequences were ATGTCCACGAGGTCTCT,  
495 CCTCGACCTGCAGCGTA, CGGTGTCGGTCTCGTAG, and CCCAGCTCGAATTCATC  
496 for “up”, forward and reverse, and “down”, forward and reverse, respectively. The  
497 amplified DNA was purified<sup>51</sup>, quantitated, single-end adapters with index primers



498 (Illumina) ligated to each sample, and single-end sequenced on a HiSeq 2500 (ARC  
499 Biotechnology Platform, University of Pretoria).

500 The number of times that each barcode sequence was present in the FASTQ file was  
501 assessed for “up” and “down” barcodes with *get\_seqs\_from\_fastq* for each time point,  
502 quantitated with *match\_barcodes\_to\_strain*, and the average of the “up” and “down”  
503 value, adjusted for the amplified DNA signal, expressed as the log<sub>2</sub> ratio relative to the  
504 level in the mixed starting population. The code is available at [github.com/hpatterton](https://github.com/hpatterton). The  
505 data was deposited in the NCBI GEO archive (accession number GSE140160).

#### 506 **Verification of chronological lifespan**

507 To verify the results of the barcode analysis, 250 ml of YPD liquid media was inoculated  
508 to an OD<sub>600</sub> of 0.06 with starter cultures of selected mutant strains, and incubated for up  
509 to 50 d at 30°C with shaking (180 rpm). Aliquotes (100 µl) of cells were recovered at  
510 sequential times, serially diluted onto YPD-agar plates, and the number of colony forming  
511 units (CFU/ml) determined after incubating for 2 d at 30°C. Biological replicates were  
512 quantitated.

#### 513 **RNA-seq**

514 Total RNA was isolated from 10 ml cultures of yeast strains and purified with an RNeasy  
515 kit (Qiagen). The RNA was prepared for sequencing using the TruSeq Stranded Total  
516 RNA Sample Prep adaptor kit (Illumina). The samples were sequenced on a HiSeq 2500  
517 instrument (Illumina) using the 100 nt paired-ends sequencing protocol. Biological  
518 replicates of each sample were independently prepared, sequenced and analysed.

519 The quality of the sequence reads was assessed with FastQC, and reads trimmed and  
520 filtered for a minimum Q score and length with Trim Galore. Reads were mapped to  
521 version 64 of the reference yeast genome ([www.yeastgenome.org](http://www.yeastgenome.org)) with RNA STAR. The  
522 number of mapped reads per gene was counted with featureCounts, and differential  
523 expression quantitated with edgeR. The RNA-seq data was deposited in the NCBI GEO  
524 archive (accession number GSE141975).

### 525 **ChIP-seq**

526 Cultures (50 ml) were cross-linked in 1% (v/v) formaldehyde for 20 m, 25°C, and the  
527 reaction quenched with glycine (125 mM), 5 m, 25°C. The cells were washed once in 50  
528 ml PBS (pH 7.4), and resuspended in lysis buffer (50 mM HEPES-KOH pH 7.4, 140 mM  
529 NaCl, 1mM EDTA, 1% (v/v) Triton-X-100 and Complete-mini EDTA free protease inhibitor  
530 cocktail [Roche]). Cells were lysed with 300 µl acid washed glass beads (425-600 µm) by  
531 vigorous agitation for 30 s in a BeadRuptor2 followed by 30 s on ice, repeated 7 times.  
532 Sufficient lysis (90%) was confirmed by light microscopy. The lysate was subsequently  
533 sonicated at 4°C to obtain an average DNA fragment length of 300 bp. Samples were  
534 centrifuged and the supernatant, containing sheared chromatin, recovered.

535 Chromatin was pre-cleared with 20 µl protein A/G magnetic beads (Invitrogen), at 4°C for  
536 1 hour. Pre-cleared chromatin was incubated with 10 µg of anti-Sir3 polyclonal IgG  
537 antibody (Genscript) or anti-Rap1 polyclonal IgG antibody (Abcam) for 30 min before 25  
538 µl of the protein A/G magnetic beads was added. Samples were immuno-precipitated  
539 overnight at 4°C with rotation. The supernatant was removed and the beads washed 3×  
540 in wash buffer (0.1% [w/v] SDS, 1% [v/v] TritonX-100, 20 mM EDTA, 20 mM Tris-HCl pH

541 8.0, 150 mM NaCl) followed by 1× wash in wash buffer 2 (0.1% [w/v] SDS, 1% [v/v]  
542 TritonX-100, 2 mM EDTA, 20 mM Tris-HCl pH8.0, 500 mM NaCl), and finally resuspended  
543 in elution buffer (1% [w/v] SDS, 100 mM NaHCO<sub>3</sub>). The supernatant was incubated at  
544 65°C with 90 µg proteinase K, 4 h. Samples were subsequently incubated at 37°C, 30  
545 min after the addition of 35 µg RNase A. DNA was purified by phenol-chloroform  
546 extraction, precipitated in absolute ethanol, and stored at -80°C.

547 The Rap1 samples were sequenced using a standard paired-ends protocol described by  
548 the manufacturer (Illumina) on a HiSeq250 instrument. For the Sir3 samples, a  
549 sequencing library was prepared with a NEXTFlex DNA Sequencing kit (PerkinElmer)  
550 according to the manufacturer's protocol. End-repaired DNA fragments were ligated to  
551 IonCode Barcode Adapters (PerkinElmer), amplified, and sequenced to a median read  
552 length of 300 nt on an Ion S5 system. The read quality was assessed and the reads  
553 filtered as for the RNA-seq technique, the filtered reads mapped to version 64 of the  
554 *S. cerevisiae* reference yeast genome with Bowtie2, and peaks identified relative to a  
555 matched input sample with MACS2. The generated bedgraph files were converted to  
556 wiggle format, and the total signal in the immune-precipitated and input files adjusted to  
557 the identical sum. An identical normalisation was performed for different strains to allow  
558 cross comparison. The ChIP-seq analysis was performed on two biological replicates.  
559 The Rap1 and Sir3 ChIP-seq data were deposited in the NCBI GEO archive (accession  
560 numbers GSE141306 and GSE141317, respectively).

## 561 **Data analysis and statistics**

562 Various C++ and Python 3 programs and scripts were developed to perform data  
563 conversions and analyses, and are all available from <http://www.github.com/hpatterton>.  
564 Get\_seqs\_from\_fastq was used to count the number of occurrences of each histone  
565 mutant barcode in a FASTQ file. GO category enrichment was determined with GOrilla<sup>52</sup>  
566 and pathway analysis with KEGG Mapper<sup>53</sup>. Bedgraph files generated by MACS2 were  
567 converted to wiggle format and normalized with the convert\_bedgraph\_to\_wiggle and  
568 normalize\_wiggle programs.

## 569 **Conflict of interest**

570 None to declare

## 571 **Acknowledgements**

572 This work was partially supported by the National Institutes of Health (Grant  
573 1U01HG007465, to HGP). The funding body did not contribute to the design of the study,  
574 collection, analysis, and interpretation of data, or to writing the manuscript. We thank  
575 Junbiao Dai for providing reconstructed WT JD47 yeast strain, Dawie van Niekerk for  
576 advice on binding equilibria, and Riaan de Witt for critical reading of the manuscript.

## 577 **Contributions**

578 MN performed the mutant library culturing and bar-code sequencing, chronological  
579 lifespan verification, RNA-seq and Rap1 ChIP-seq experiment and edited the manuscript,  
580 JR performed the Sir3 ChIP-seq experiment and edited the manuscript. HGP conceived

581 and managed the project, analysed the data, prepared the figures, coded programs where  
582 required, and wrote the paper.

583

## 584 References

- 585 1. Johnson, S. C., Rabinovitch, P. S. & Kaeberlein, M. mTOR is a key modulator of  
586 ageing and age-related disease. *Nature* **493**, 338–345 (2013).
- 587 2. Kourtis, N. & Tavernarakis, N. Cellular stress response pathways and ageing:  
588 intricate molecular relationships. *EMBO J.* **30**, 2520–31 (2011).
- 589 3. Lin, S.-J. *et al.* Calorie restriction extends *Saccharomyces cerevisiae* lifespan by  
590 increasing respiration. *Nature* **418**, 344–348 (2002).
- 591 4. Longo, V. D. & Fabrizio, P. Chronological Aging in *Saccharomyces cerevisiae*.  
592 *Subcell. Biochem.* **57**, 101–121 (2012).
- 593 5. Medvedik, O., Lamming, D. W., Kim, K. D. & Sinclair, D. A. MSN2 and MSN4 link  
594 calorie restriction and TOR to sirtuin-mediated lifespan extension in  
595 *Saccharomyces cerevisiae*. *PLoS Biol.* **5**, e261 (2007).
- 596 6. Barros, M. H., Bandy, B., Tahara, E. B. & Kowaltowski, A. J. Higher respiratory  
597 activity decreases mitochondrial reactive oxygen release and increases life span in  
598 *Saccharomyces cerevisiae*. *J. Biol. Chem.* **279**, 49883–49888 (2004).
- 599 7. Pellegrino, M. W., Nargund, A. M. & Haynes, C. M. Signaling the mitochondrial  
600 unfolded protein response. *Biochim. Biophys. Acta - Mol. Cell Res.* **1833**, 410–416  
601 (2013).
- 602 8. Tyler, J. K. & Johnson, J. E. The role of autophagy in the regulation of yeast life

- 603 span. *Ann. N. Y. Acad. Sci.* **1418**, 31–43 (2018).
- 604 9. Pal, S. & Tyler, J. K. Epigenetics and aging. *Sci. Adv.* **2**, e1600584 (2016).
- 605 10. Liu, L. *et al.* Chromatin modifications as determinants of muscle stem cell  
606 quiescence and chronological aging. *Cell Rep.* **4**, 189–204 (2013).
- 607 11. Gross, D. S. & Garrard, W. T. Nuclease Hypersensitive Sites in Chromatin. *Annu.*  
608 *Rev. Biochem.* **57**, 159–197 (1988).
- 609 12. Booth, L. N. & Brunet, A. The aging epigenome. *Mol. Cell* **62**, 728–744 (2016).
- 610 13. Kaeberlein, M., McVey, M. & Guarente, L. The SIR2/3/4 complex and SIR2 alone  
611 promote longevity in *Saccharomyces cerevisiae* by two different mechanisms.  
612 *Genes Dev.* **13**, 2570–2580 (1999).
- 613 14. Burnett, C. *et al.* Absence of effects of Sir2 overexpression on lifespan in *C. elegans*  
614 and *Drosophila*. *Nature* **477**, 482–485 (2011).
- 615 15. Tian, X. *et al.* SIRT6 Is Responsible for More Efficient DNA Double-Strand Break  
616 Repair in Long-Lived Species. *Cell* **177**, 622-638.e22 (2019).
- 617 16. Sen, P. *et al.* H3K36 methylation promotes longevity by enhancing transcriptional  
618 fidelity. *Genes Dev.* **29**, 1362–1376 (2015).
- 619 17. Dang, W. *et al.* Histone H4 lysine 16 acetylation regulates cellular lifespan. *Nature*  
620 **459**, 802–807 (2009).

- 621 18. Austriaco, N. R. J. & Guarente, L. P. Changes of telomere length cause reciprocal  
622 changes in the lifespan of mother cells in *Saccharomyces cerevisiae*. *Proc. Natl.*  
623 *Acad. Sci. U. S. A.* **94**, 9768–9772 (1997).
- 624 19. Walter, D., Matter, A. & Fahrenkrog, B. Loss of histone H3 methylation at lysine 4  
625 triggers apoptosis in *Saccharomyces cerevisiae*. *PLoS Genet.* **10**, e1004095  
626 (2014).
- 627 20. Oh, S., Suganuma, T., Gogol, M. M. & Workman, J. L. Histone H3 threonine 11  
628 phosphorylation by Sch9 and CK2 regulates chronological lifespan by controlling  
629 the nutritional stress response. *Elife* **7**, (2018).
- 630 21. Hayano, M. *et al.* DNA Break-Induced Epigenetic Drift as a Cause of Mammalian  
631 Aging. *bioRxiv* 808659 (2019). doi:10.1101/808659
- 632 22. Yang, J.-H. *et al.* Erosion of the Epigenetic Landscape and Loss of Cellular Identity  
633 as a Cause of Aging in Mammals. *bioRxiv* 808642 (2019). doi:10.1101/808642
- 634 23. Dai, J. *et al.* Probing Nucleosome Function: A Highly Versatile Library of Synthetic  
635 Histone H3 and H4 Mutants. *Cell* **134**, 1066–1078 (2008).
- 636 24. Allen, C. *et al.* Isolation of quiescent and nonquiescent cells from yeast stationary-  
637 phase cultures. *J. Cell Biol.* **174**, 89–100 (2006).
- 638 25. Smith, A. M. *et al.* Quantitative phenotyping via deep barcode sequencing. *Genome*  
639 *Res.* **19**, 1836–1842 (2009).



- 640 26. Burtner, C. R., Murakami, C. J., Kennedy, B. K. & Kaeberlein, M. A molecular  
641 mechanism of chronological aging in yeast. *Cell Cycle* **8**, 1256–1270 (2009).
- 642 27. Fry, C. J., Norris, A., Cosgrove, M., Boeke, J. D. & Peterson, C. L. The LRS and  
643 SIN domains: two structurally equivalent but functionally distinct nucleosomal  
644 surfaces required for transcriptional silencing. *Mol. Cell. Biol.* **26**, 9045–9059  
645 (2006).
- 646 28. Armache, K.-J., Garlick, J. D., Canzio, D., Narlikar, G. J. & Kingston, R. E. Structural  
647 basis of silencing: Sir3 BAH domain in complex with a nucleosome at 3.0 Å  
648 resolution. *Science* **334**, 977–982 (2011).
- 649 29. Wang, F. *et al.* Heterochromatin protein Sir3 induces contacts between the amino  
650 terminus of histone H4 and nucleosomal DNA. *Proc Natl Acad Sci U S A* **110**, 8495–  
651 8500 (2013).
- 652 30. Mei, Q. *et al.* Set1-catalyzed H3K4 trimethylation antagonizes the HIR/Asf1/Rtt106  
653 repressor complex to promote histone gene expression and chronological life span.  
654 *Nucleic Acids Res.* **47**, 3434–3449 (2019).
- 655 31. Zhu, X. & Gustafsson, C. M. Distinct Differences in Chromatin Structure at  
656 Subtelomeric X and Y' Elements in Budding Yeast. *PLoS One* **4**, e6363 (2009).
- 657 32. Wahlin, J. & Cohn, M. *Saccharomyces cerevisiae* RAP1 binds to telomeric  
658 sequences with spatial flexibility. *Nucleic Acids Res.* **28**, 2292–2301 (2000).

- 659 33. Platt, J. M. *et al.* Rap1 relocalization contributes to the chromatin-mediated gene  
660 expression profile and pace of cell senescence. *Genes Dev.* **27**, 1406–1420 (2013).
- 661 34. Garay, E. *et al.* High-resolution profiling of stationary-phase survival reveals yeast  
662 longevity factors and their genetic interactions. *PLoS Genet.* **10**, e1004168 (2014).
- 663 35. Powers, R. W. 3rd, Kaeberlein, M., Caldwell, S. D., Kennedy, B. K. & Fields, S.  
664 Extension of chronological life span in yeast by decreased TOR pathway signaling.  
665 *Genes Dev.* **20**, 174–184 (2006).
- 666 36. Elgin, S. C. R. & Reuter, G. Position-effect variegation, heterochromatin formation,  
667 and gene silencing in *Drosophila*. *Cold Spring Harb. Perspect. Biol.* **5**, a017780  
668 (2013).
- 669 37. Jona, G., Choder, M. & Gileadi, O. Glucose starvation induces a drastic reduction  
670 in the rates of both transcription and degradation of mRNA in yeast. *Biochim.*  
671 *Biophys. Acta* **1491**, 37–48 (2000).
- 672 38. Walsh, M. Characterisation of novel Histone H3 RAD9 mutants defective in the  
673 DNA damage response in *Saccharomyces cerevisiae*. (National University of  
674 Ireland, 2013).
- 675 39. Mei, Q. *et al.* Set1-catalyzed H3K4 trimethylation antagonizes the HIR/Asf1/Rtt106  
676 repressor complex to promote histone gene expression and chronological life span.  
677 *Nucleic Acids Res.* **47**, 3434–3449 (2019).

- 678 40. Fabrizio, P., Pozza, F., Pletcher, S. D., Gendron, C. M. & Longo, V. D. Regulation  
679 of longevity and stress resistance by Sch9 in yeast. *Science* **292**, 288–290 (2001).
- 680 41. Hibbs, M. A. *et al.* Exploring the functional landscape of gene expression: directed  
681 search of large microarray compendia. *Bioinformatics* **23**, 2692–2699 (2007).
- 682 42. Huang, H. *et al.* HistoneHits: a database for histone mutations and their  
683 phenotypes. *Genome Res.* **19**, 674–681 (2009).
- 684 43. Smeal, T., Claus, J., Kennedy, B., Cole, F. & Guarente, L. Loss of Transcriptional  
685 Silencing Causes Sterility in Old Mother Cells of *S. cerevisiae*. *Cell* **84**, 633–642  
686 (1996).
- 687 44. Ozaydin, B. & Rine, J. Expanded roles of the origin recognition complex in the  
688 architecture and function of silenced chromatin in *Saccharomyces cerevisiae*. *Mol.*  
689 *Cell. Biol.* **30**, 626–639 (2010).
- 690 45. Kueng, S., Oppikofer, M. & Gasser, S. M. SIR Proteins and the Assembly of Silent  
691 Chromatin in Budding Yeast. *Annu. Rev. Genet.* **47**, 275–306 (2013).
- 692 46. Oppikofer, M. *et al.* Dimerization of Sir3 via its C-terminal winged helix domain is  
693 essential for yeast heterochromatin formation. *EMBO J.* **32**, 437–449 (2013).
- 694 47. Valenzuela, L., Dhillon, N. & Kamakaka, R. T. Transcription independent insulation  
695 at TFIIIC-dependent insulators. *Genetics* **183**, 131–148 (2009).
- 696 48. van Leeuwen, F., Gafken, P. R. & Gottschling, D. E. Dot1p modulates silencing in

- 697 yeast by methylation of the nucleosome core. *Cell* **109**, 745–756 (2002).
- 698 49. Meneghini, M. D., Wu, M. & Madhani, H. D. Conserved histone variant H2A.Z  
699 protects euchromatin from the ectopic spread of silent heterochromatin. *Cell* **112**,  
700 725–736 (2003).
- 701 50. Sampath, V. *et al.* Mutational analysis of the Sir3 BAH domain reveals multiple  
702 points of interaction with nucleosomes. *Mol. Cell. Biol.* **29**, 2532–45 (2009).
- 703 51. Cole, H. A., Howard, B. H. & Clark, D. J. Genome-wide mapping of nucleosomes  
704 in yeast using paired-end sequencing. *Methods in enzymology* **513**, 145–68 (2012).
- 705 52. Eden, E., Navon, R., Steinfeld, I., Lipson, D. & Yakhini, Z. GOrilla: a tool for  
706 discovery and visualization of enriched GO terms in ranked gene lists. *BMC*  
707 *Bioinformatics* **10**, 48 (2009).
- 708 53. Kanehisa, M., Goto, S., Sato, Y., Furumichi, M. & Tanabe, M. KEGG for integration  
709 and interpretation of large-scale molecular data sets. *Nucleic Acids Res.* **40**, D109-  
710 14 (2012).

711

712

713

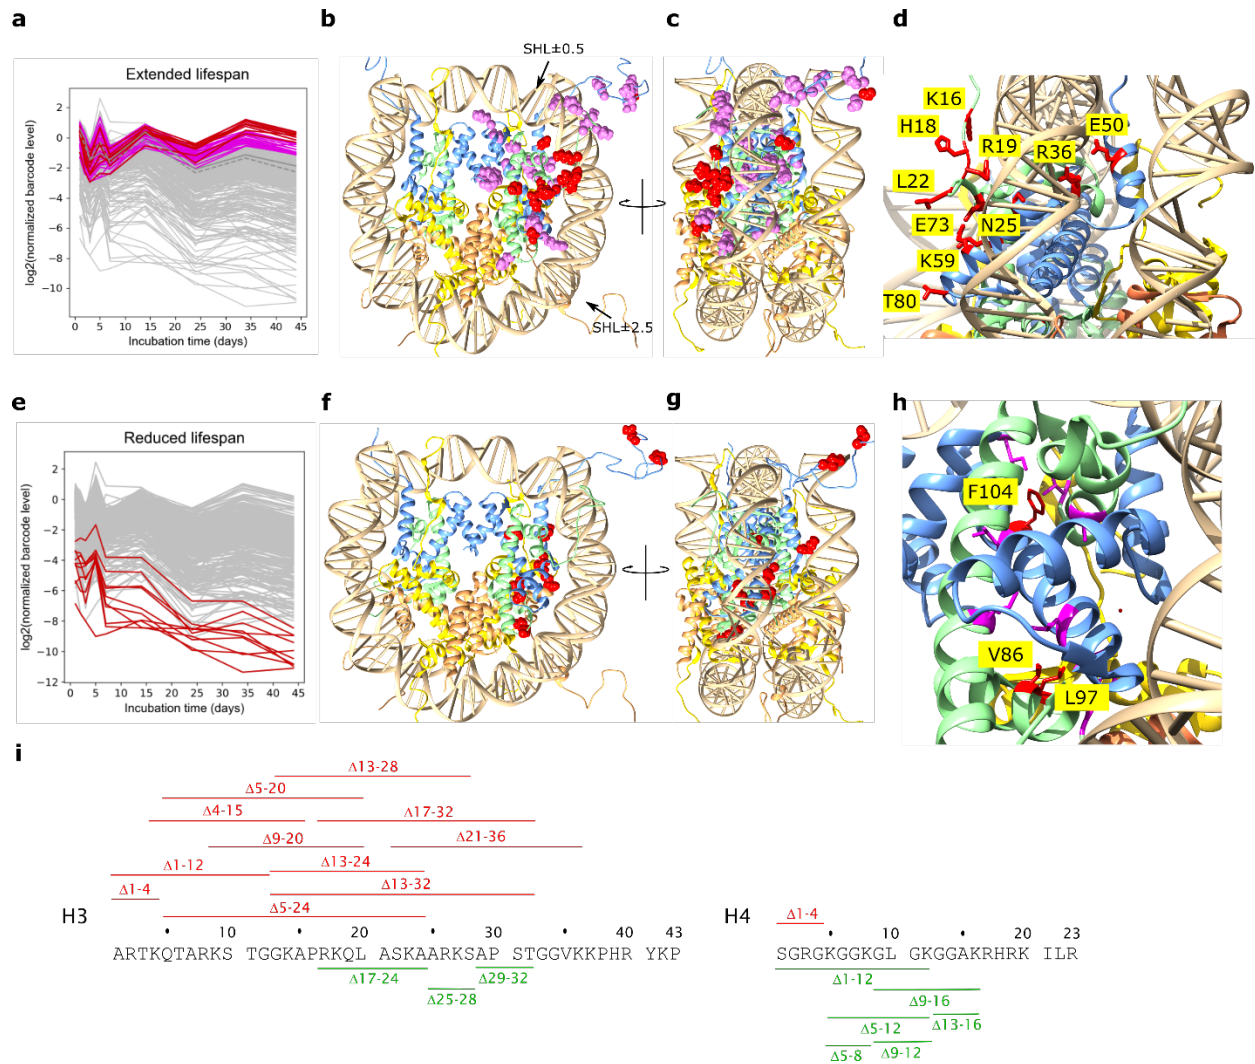

714

715 **Fig 1. Chronological lifespan of histone mutants.** The barcode level of each of the  
 716 approximately 400 tagged histone mutant strains was determined by sequencing in the  
 717 quiescent pool at different times in stationary phase, and expressed as log<sub>2</sub> relative to the  
 718 level at the start of stationary phase (6d), and adjusted to the population median. The log<sub>2</sub>  
 719 ratios of the top 10 individual (red) and top 10% (violet) of strains with most extended  
 720 lifespan (**a**) and bottom 10 individual strains (red) with most reduced lifespan (**e**) are  
 721 shown at progressive times of incubation. The trace of the log<sub>2</sub> levels of the parental WT  
 722 and median strain are shown by solid and dashed dark grey lines respectively (**a**). The

723 residues implicated in the top 10 individual and top 10% of strains that exhibit extended  
724 lifespans are shown in red and violet sphere conformation in the structure of the  
725 nucleosome (1KX5), respectively (**b**), and the bottom 10 individual strains with the most  
726 reduced lifespans are shown in red sphere conformation (**f**). The positions of superhelix  
727 locations (SHL)  $\pm 0.5$  and  $\pm 2.5$  aligned with the Sin and Lrs sectors<sup>27</sup> are indicated by  
728 arrows (**b**). The structures in **b** and **f** are shown rotated by 90° clockwise viewed from  
729 the top (**c,g**). The 10 individual residues associated with most extended (**d**) and most  
730 reduced (**h**) lifespan are shown in stick conformation with individual residues identified.  
731 The deletions of sections of the N-terminal tails of H3 and H4 that are associated with  
732 extended (green) or reduced (red) CL are indicated (**i**).

733

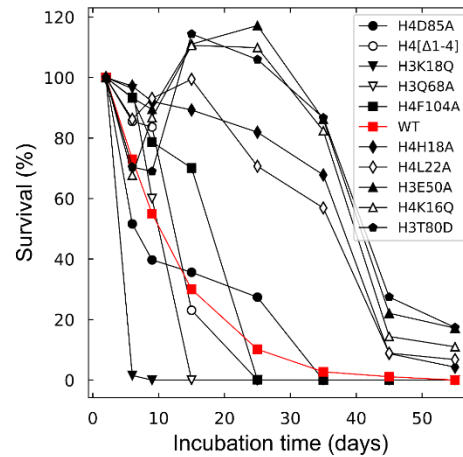

734

735 **Fig. 2. Growth curve of selected strains with extended and truncated lifespans.**

736 Strains with extended or shortened lifespans were selected and cultured individually for  
737 up to 55 days. The cell density of each strain was determined at different times, and the  
738 percentage cells remaining relative to the starting culture is shown at the different culture  
739 times. The strain with the *WT* histones H3 and H4 are indicated by the red plot. Each data  
740 point is the average of biological duplicates.

741

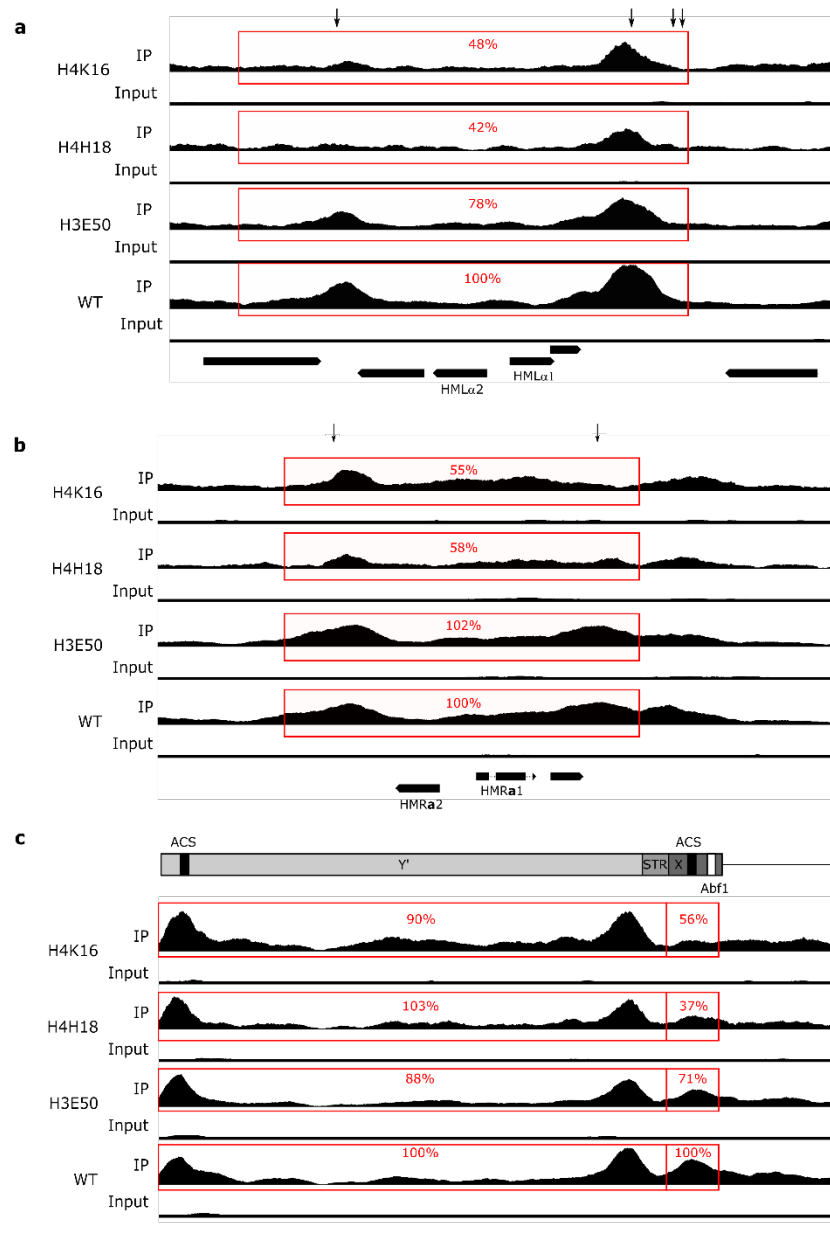

742

743 **Fig. 3. Redistribution of Sir3 in mutant strains.** The genomic distribution of Sir3 was  
744 determined for the H4K16Q, H4H18A, H3E50A and WT strains. The immuno-precipitated  
745 and input signal, normalised to a ratio of 1, is shown for each strain at the HML $\alpha$  (a),  
746 HMRA (b) and left telomere of chromosome IX (c). The arrows indicate the positions of  
747 autonomously replicating consensus sequences (ACSs). The percentage of the pull-



748 down signal relative to the WT strain is shown for each track (representative for biological  
749 replicates, n=2). The positions of the MAT $\alpha$ 1, MAT $\alpha$ 2, MATa1 and MATa2 genes are  
750 indicated. The line diagram at the top of panel **c** shows the location of the X and Y'  
751 telomeric elements, the ACSs, Abf1 binding site and sub-telomeric repeat sequences  
752 (STR).

753

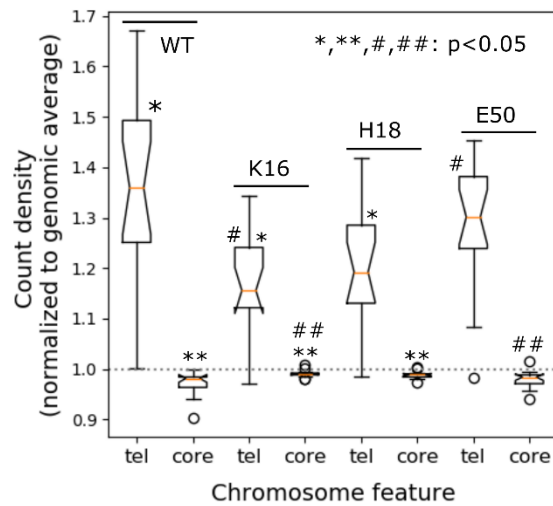

754

755 **Fig. 4. Distribution of Sir3 between telomeres and chromosome cores.** The level of  
756 Sir 3 associated with the 20kb chromosome termini and the internal core regions  
757 excluding the 20 kb termini were determined from the ChIP-seq signal for each of the 16  
758 chromosomes, and normalised to the genome average. The values are shown for the  
759 WT and H4K16Q, H4H18A and H3E50A mutant strains. The box plots represent the  
760 inter-quartile range (IQR), the notch represents the significance at  $p < 0.05$ , the orange line  
761 shows the median, and the whiskers is shown at  $1.5 \times$  the IQR. Outliers are shown as  
762 individual data points. WT and mutants strains and mutant-mutant strain pairs that are  
763 significantly different ( $t$ -test;  $p < 0.05$ ) in the telomeric and core regions are indicated by  
764 the \* and # and by \*\* and ## symbol pairs, respectively.

765

766

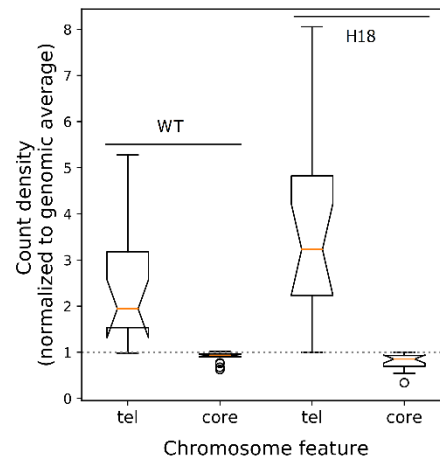

767

768 **Fig. 5. Rap1 binding in the genome.** The level of Rap1 bound to the 20kb chromosome  
769 termini (tel) and the internal core regions excluding the termini (core) were determined  
770 from the ChIP-seq signal for each of the 16 chromosomes, and normalised to the genome  
771 average. The values are shown for the WT and H4H18A mutant strains. The box plots  
772 represent the inter-quartile range (IQR), the notch represents the significance at  $p < 0.05$ ,  
773 the orange line shows the median, and the whiskers is shown at  $1.5 \times$  the IQR. Outliers  
774 are shown as individual data points.

775

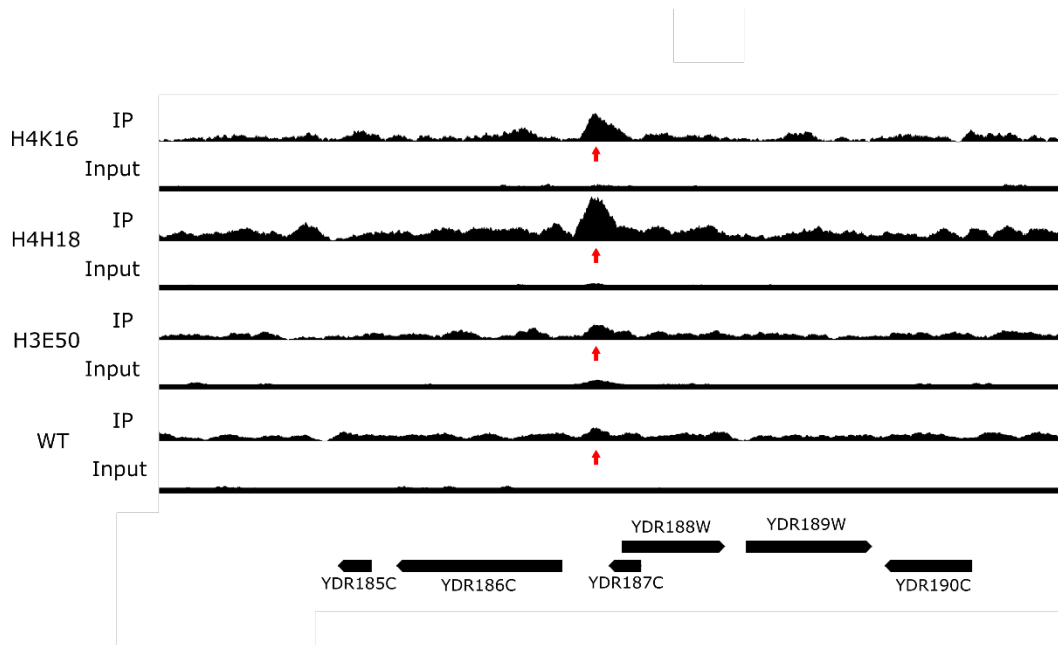

776

777 **Fig. 6. Binding of Sir3 to secondary loci in the genome.** The normalised level of bound  
778 Sir3 in a region of the right arm of chromosome IV is shown for the H4K16Q, H4H18A,  
779 H3E50A and WT strains. The arrow identifies a Sir3 peak present upstream of the  
780 YDR186C (SND1) gene in the H4K16Q and H4H18A strains, but not in the H3E50A or  
781 WT strains.

782

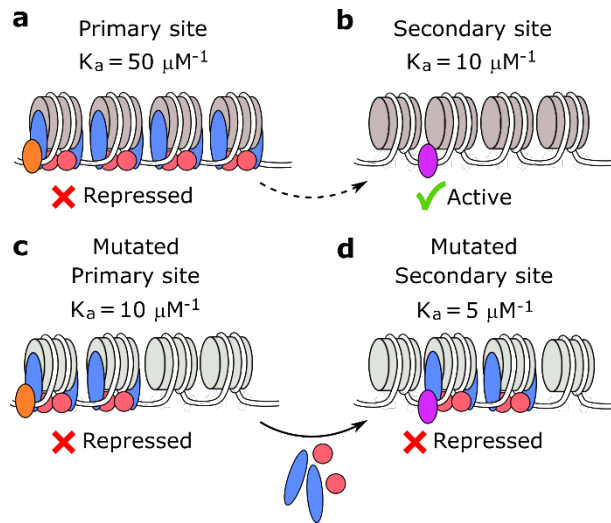

783

784

785 **Fig. 7. A model for the redistribution of Sir3 in the genome of some histone**

786 **mutant strains.** The Sir3/Sir4 complex is recruited to a high-affinity binding site by a

787 DNA bound factor to form a heterochromatin domain that represses the covered gene

788 (a). The affinity of Sir3/Sir4 for the secondary binding site is significantly less, and little

789 or no Sir3/Sir4 complex binds to this site, allowing the associated gene to remain

790 transcriptionally active (b). The mutation of a residue on the nucleosome face that

791 interacts with Sir3 decreases the affinity for the primary binding site significantly (c).

792 Although the affinity of the secondary binding sites also decreases, the presence of a

793 different DNA bound factor at this site may modulate this decrease (d). The

794 comparable affinities of the mutated primary and secondary binding sites allow Sir3/Sir4

795 to migrate from primary to secondary binding sites, causing repression of genes

796 associated with the secondary binding sites (d).

797
